# Supplementary material for: Probiotic‐Derived Polyphosphate Accelerates Intestinal Epithelia Wound Healing through Inducing Platelet‐Derived Mediators
Source: Hindawi journal article supplement (doi:10.1155/2021/5582943), 2021-01-01

Supplemental Figure 2

n.s.

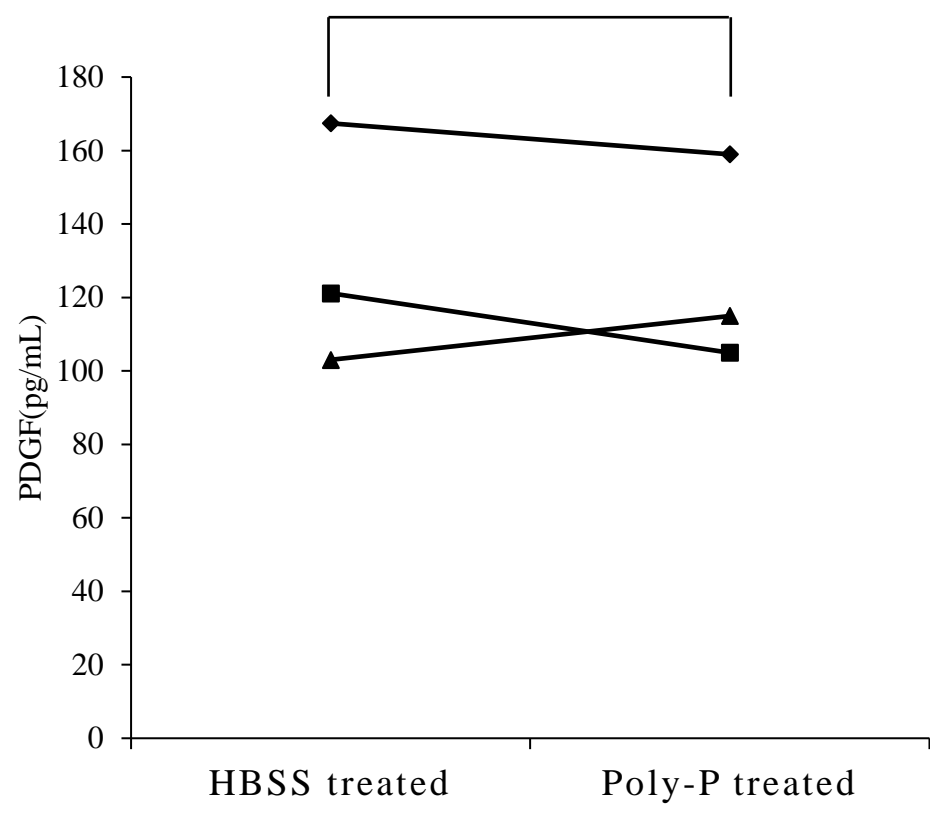

n.s.

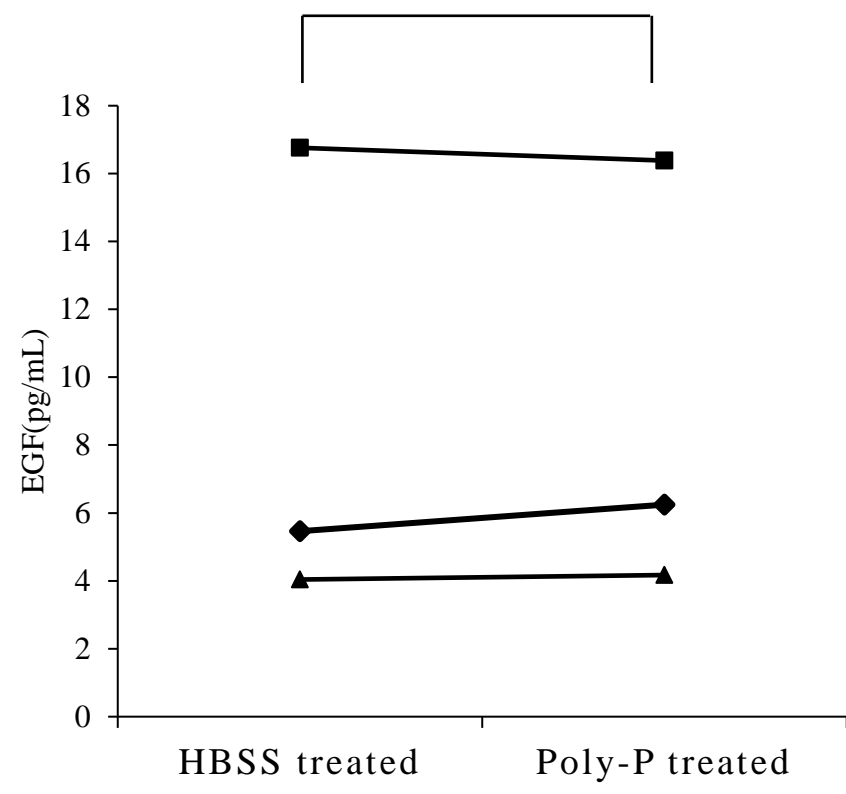

n.s.

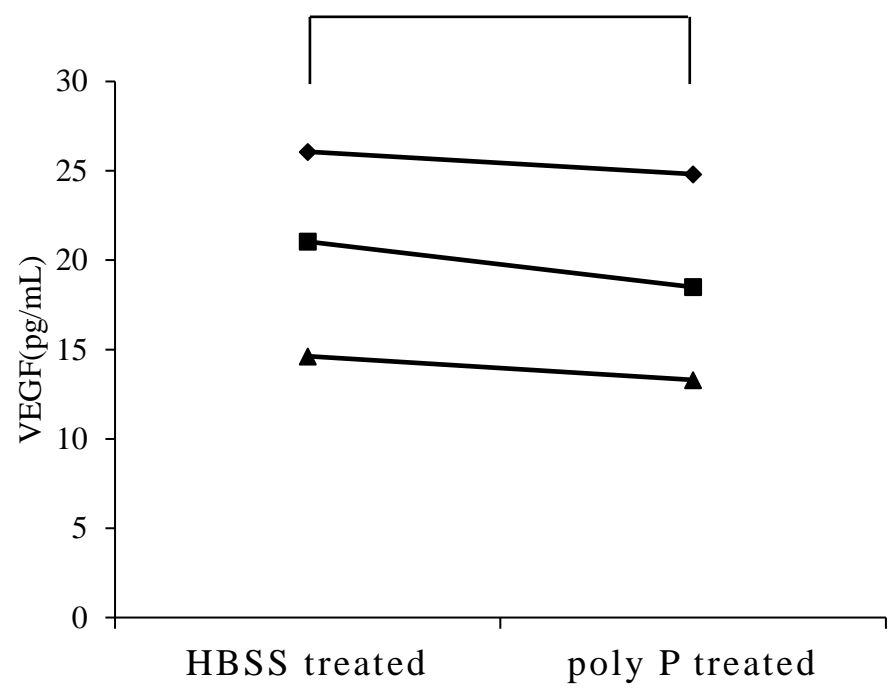

n.s.

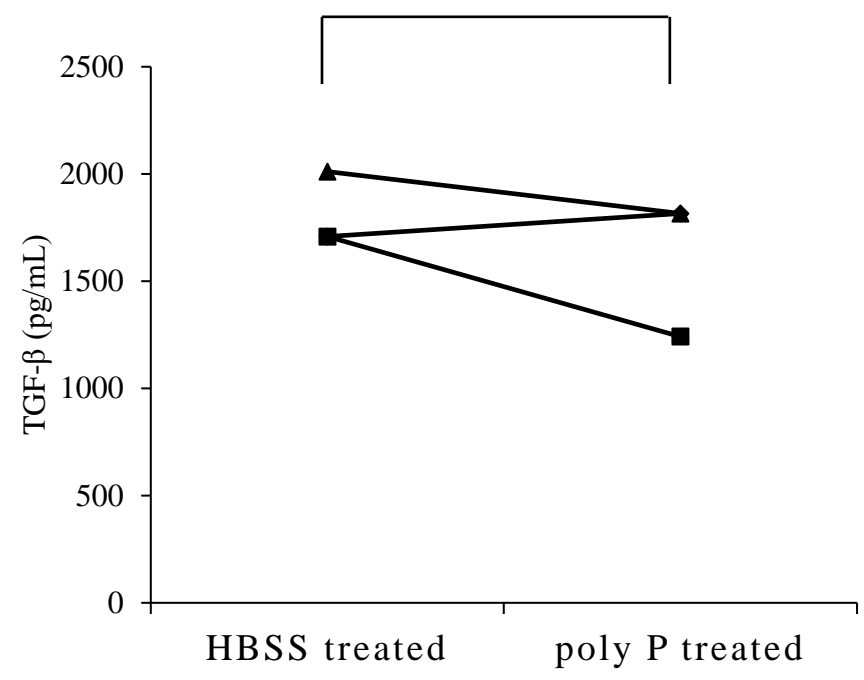

Supplement: f2 [file 5582943.f2.pdf]
